# Supplementary material for: Differential Radiomodulating Action of Olea europaea L. cv. Caiazzana Leaf Extract on Human Normal and Cancer Cells: A Joint Chemical and Radiobiological Approach
Source: MDPI journal article supplement (doi:10.3390/antiox11081603), 2022-08-19
Supplement: s1 [file s1]

## Supplementary materials

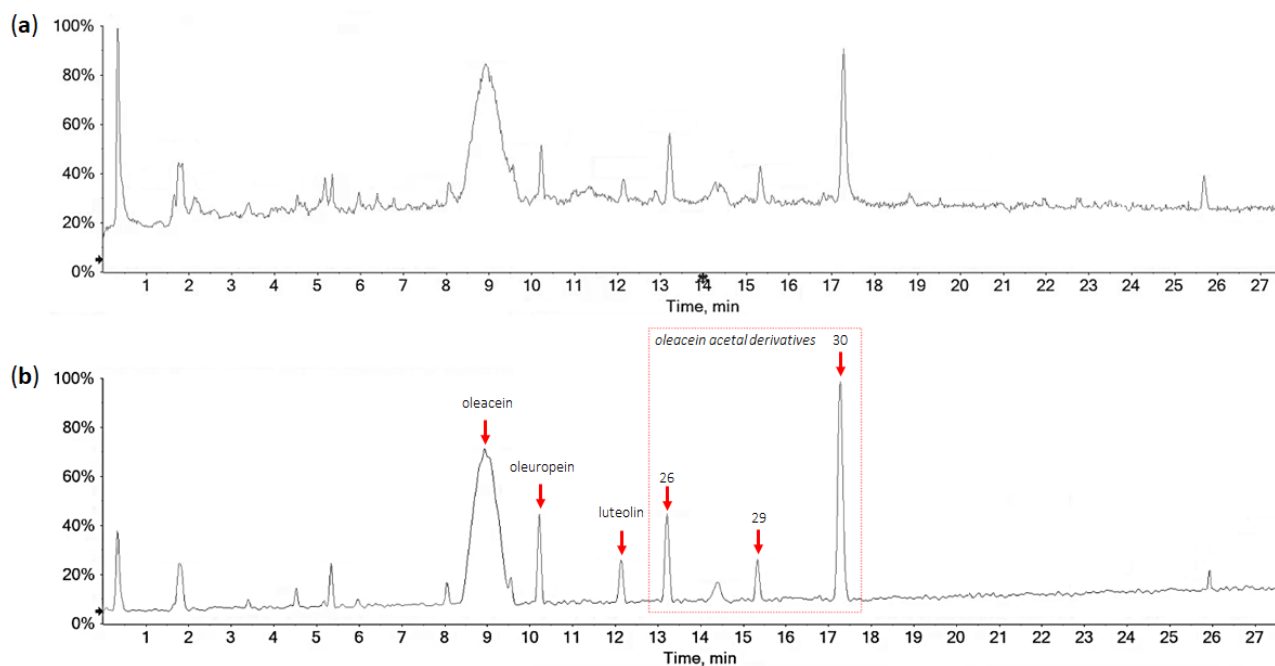

**Figure S1.** (a) Total Ion Current (TIC) and (b) Base Peak Chromatogram (BPC) of OLC extract. Red arrows denote the quantified compounds, considered the main responsible for the observed bioactivity.

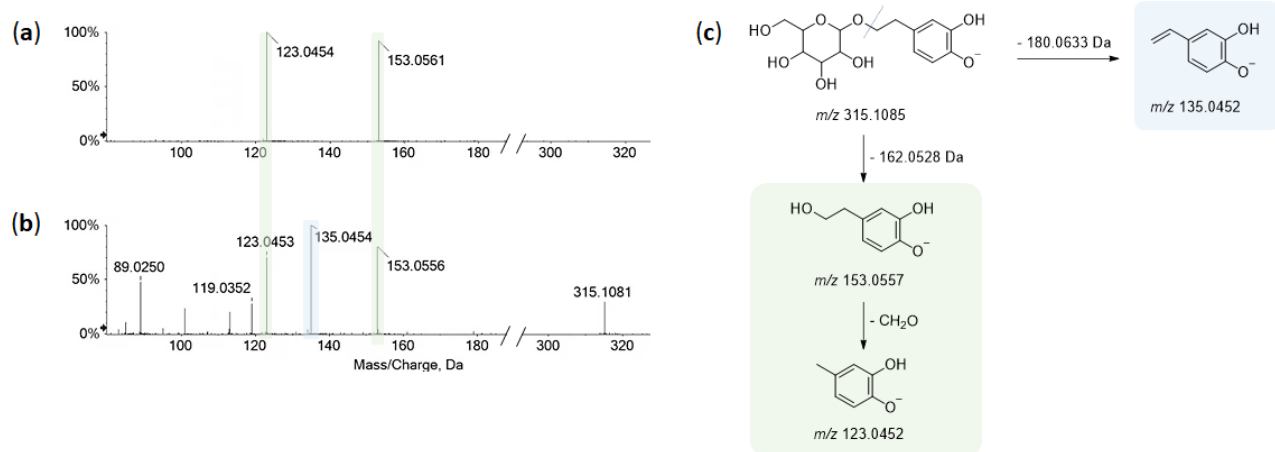

**Figure S2.** TOF-MS/MS spectra of (a) hydroxytyrosol and (b) hydroxytyrosol hexoside; (c) hypothesized fragmentation pathways.

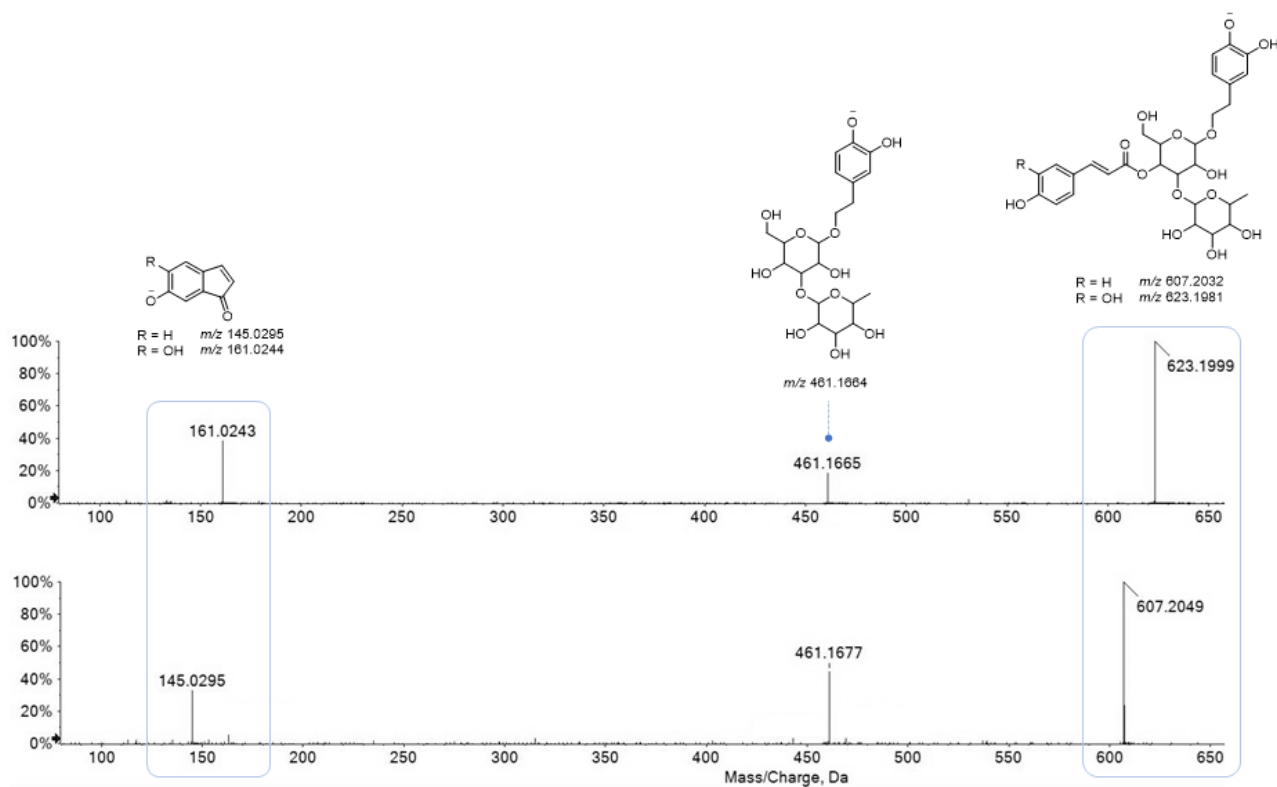

**Figure S3.** TOF-MS/MS spectra of compounds **12** (at  $m/z$  623.1981, calc. mass), **15** and **21** (at  $m/z$  607.2032, calc. mass). The hypothesized chemical structures of the detected ions are reported with theoretical  $m/z$  values.

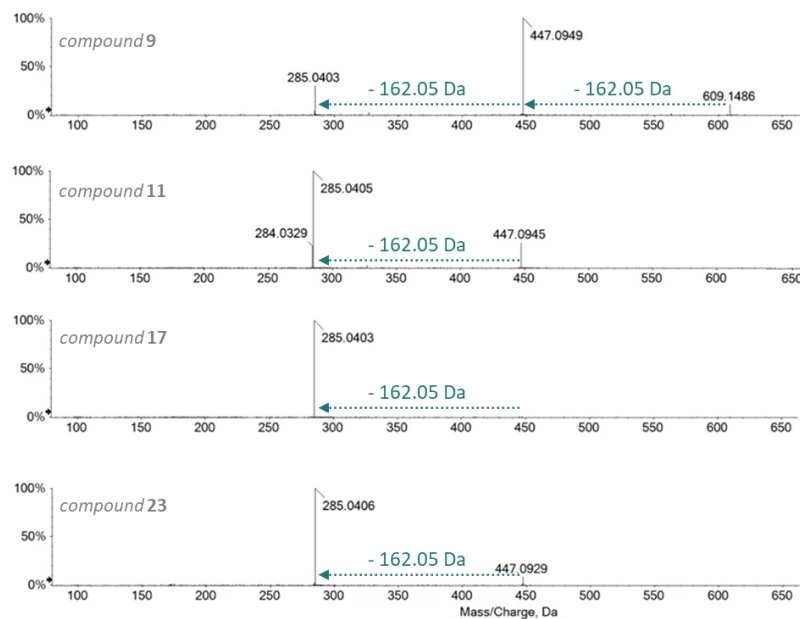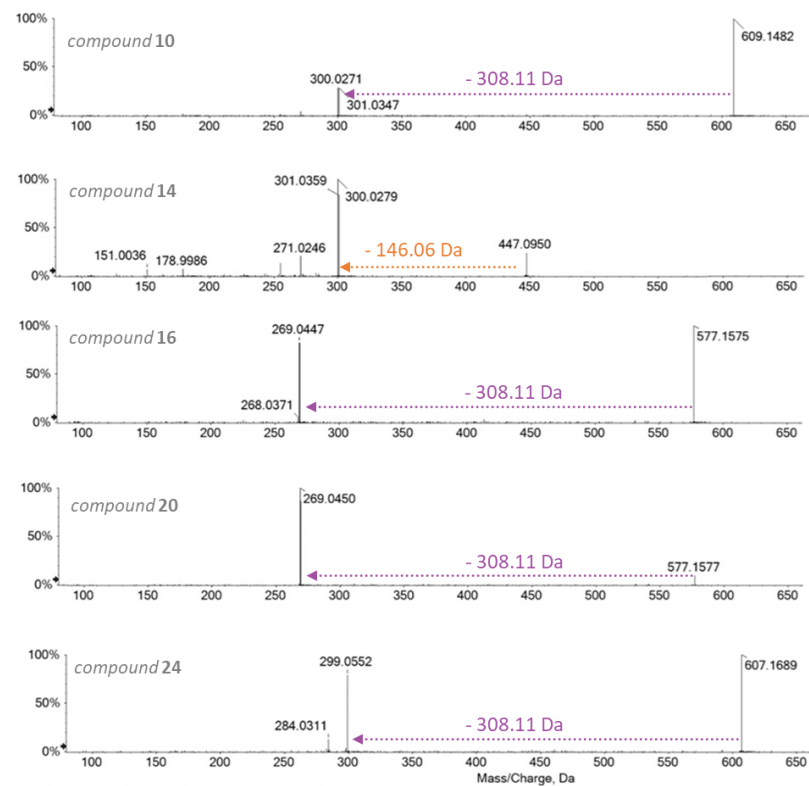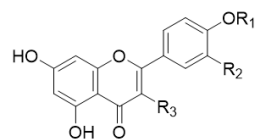

#### aglycones

|            |                                  |                     |                     |           |
|------------|----------------------------------|---------------------|---------------------|-----------|
| 9,11,17,23 | R <sub>1</sub> = H               | R <sub>2</sub> = OH | R <sub>3</sub> = H  | luteolin  |
| 10,14      | R <sub>1</sub> = H               | R <sub>2</sub> = OH | R <sub>3</sub> = OH | quercetin |
| 16,20      | R <sub>1</sub> = H               | R <sub>2</sub> = H  | R <sub>3</sub> = H  | apigenin  |
| 24         | R <sub>1</sub> = CH <sub>3</sub> | R <sub>2</sub> = OH | R <sub>3</sub> = H  | diosmetin |

deoxyhexose - H<sub>2</sub>O

hexose - H<sub>2</sub>O

deoxyhexosylhexose - H<sub>2</sub>O

**Figure S4.** TOF-MS/MS spectra of detected flavonoid glycosides. The aglycone structures are provided together with the glyconic moieties.

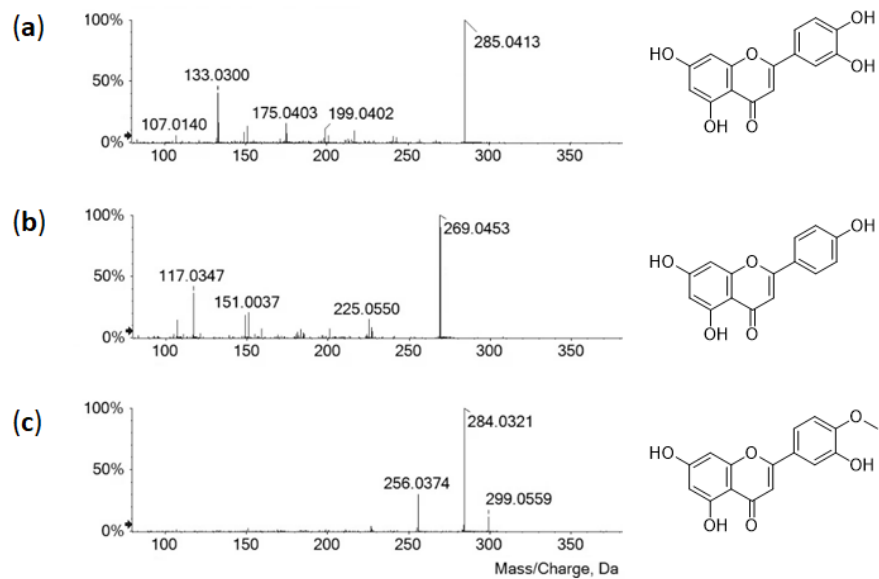

**Figure S5.** TOF-MS spectra of flavones: (a) luteolin, (b) apigenin, and (c) diosmetin.

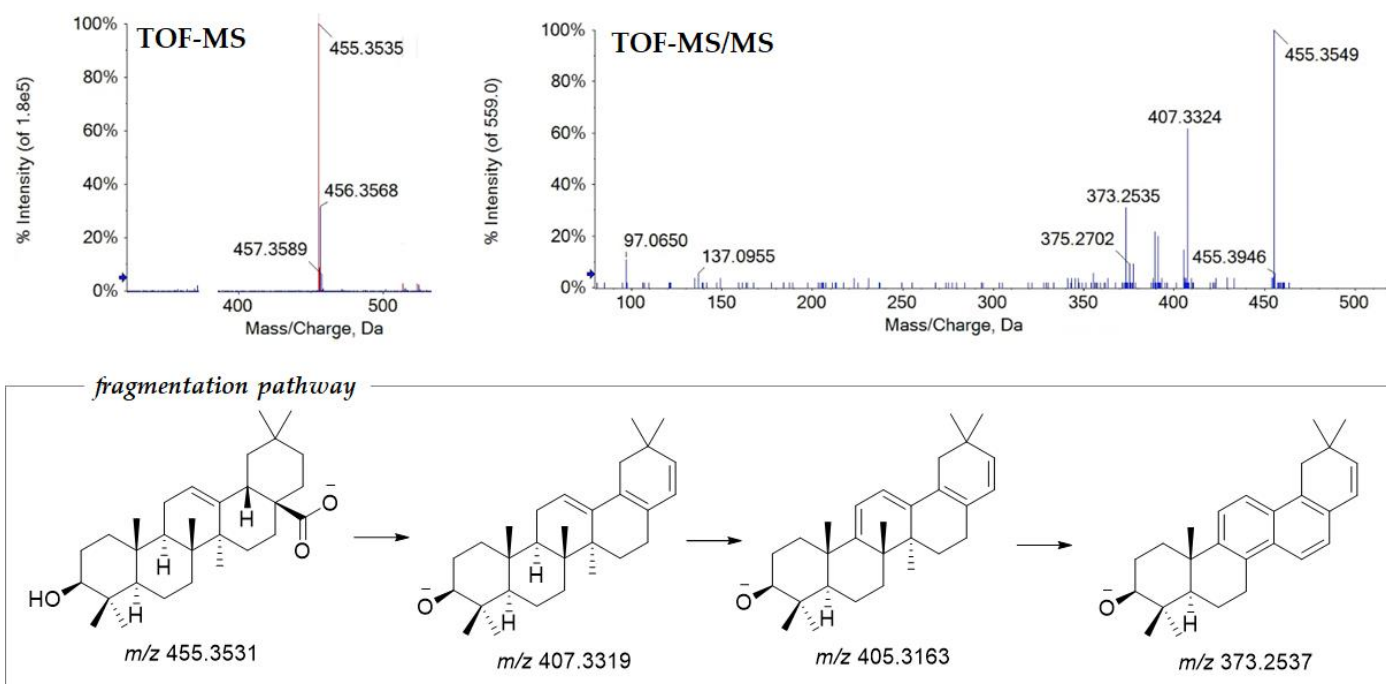

**Figure S6.** Experimental evidence of the occurrence of oleanolic acid (XIC = eXtracted Ion Chromatogram).
